# Supplementary material for: Different toxicity of cadmium telluride, silicon, and carbon nanomaterials against hemocytes in silkworm, Bombyx mori
Source: Royal Society of Chemistry journal article supplement (doi:10.1039/c7ra09622d), 2017-01-01
Supplement: c7ra09622d1.pdf [file c7ra09622d1.pdf]

## Supporting Information

### **Different toxicity of cadmium telluride, silicon, and carbon nanomaterials against hemocytes in silkworm, *Bombyx mori***

Kai-Le Li<sup>1,2, ✉</sup>, Yun-Hu Zhang<sup>1,2, ✉</sup>, Rui Xing<sup>1,2</sup>, Yan-Feng Zhou<sup>3</sup>, Xue-Dong Chen<sup>1,2</sup>,  
Hao Wang<sup>4</sup>, Bin Song<sup>3</sup>, Yang-Hu Sima<sup>1,2</sup>, Yao He<sup>3, ¶</sup>, Shi-Qing Xu<sup>1,2, ¶</sup>

1 School of Biology and Basic Medical Sciences, Medical College, Soochow University, Suzhou 215123, China.

2 National Engineering Laboratory for Modern Silk (NESER), Soochow University, Suzhou 215123, China.

3 Jiangsu Key Laboratory for Carbon-Based Functional Materials and Devices, Institute of Functional Nano and Soft Materials (FUNSOM) and Collaborative Innovation Center of Suzhou Nano Science and Technology (NANO-CIC), Soochow University, Suzhou 215123, China

4 Soochow Institute for Energy and Materials Innovations, College of Physics, Optoelectronics and Energy & Collaborative Innovation Center of Suzhou Nano Science and Technology, Soochow University, Suzhou 215006, China.

¶Corresponding author: [yaohe@suda.edu.cn](mailto:yaohe@suda.edu.cn) (Y. He), [szsqxu@suda.edu.cn](mailto:szsqxu@suda.edu.cn) (S.Q. Xu)

✉ These authors contributed equally to this work.

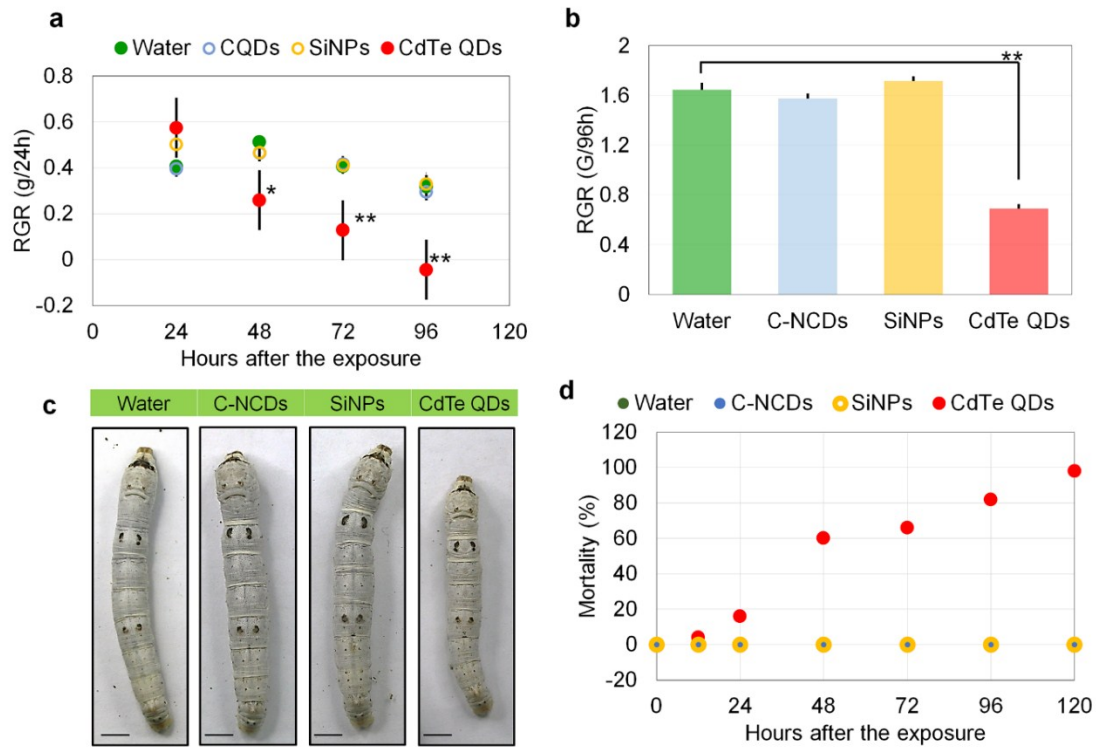

**Fig. S1** Impact of three kind of nanomaterials on growth of the larvae. (a) The Relative Growing Rate (RGR) every 24 hours and (b) the RGR during 96 hours. (c) The larval size and (d) the mortality 96h after exposure. The five instar larvae were performed dorsal vein-injection at 48-h-old. The drugs were 10  $\mu$ L 32  $\mu$ mol/L CdTe QDs, or 0.39  $\mu$ g/ $\mu$ L SiNPs, or 1  $\mu$ g/ $\mu$ L C-NCDs. The 10  $\mu$ L sterilized purified water was used for control injection. \*,  $P < 0.05$ ; \*\*,  $P < 0.01$  ( $n = 8$  larvae, repeated 3 groups). Bar = 5mm.

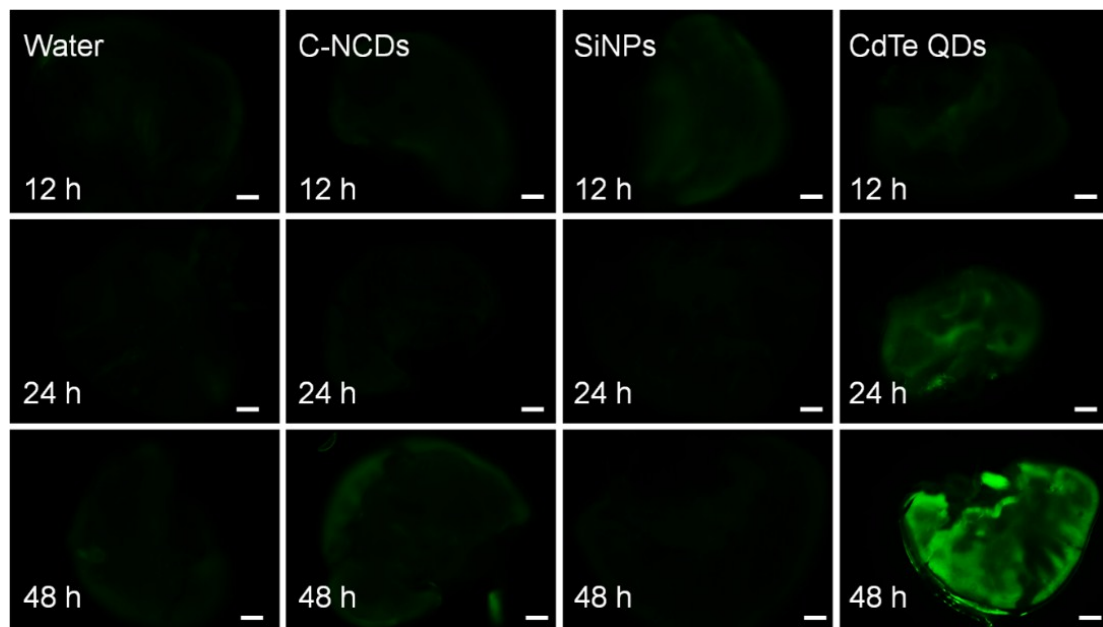

**Fig. S2** Exposure of CdTe QDs, C-NCDs and SiNPs induced the ROS generation in hemopoietic organ (HeO). The five instar larvae were performed dorsal vein-injection at 48-h-old. The drugs were 10  $\mu$ L 32  $\mu$ mol/L CdTe QDs, or 0.39  $\mu$ g/ $\mu$ L SiNPs, or 1  $\mu$ g/ $\mu$ L C-NCDs. The 10  $\mu$ L sterilized purified water was used for control injection. The HeOs isolated from larvae and performed ROS measuring at 12h, 24h and 48h after injection. Bar = 100 $\mu$ m.

**Table S1 Primer sequences used in this study**

| Genes                | Primer sequences (5'→3')                             | Gene registration number (NCBI No.) |
|----------------------|------------------------------------------------------|-------------------------------------|
| <i>Dronc</i>         | F: TGTGGCTGTCTTCCTTC<br>R: ATCTAAGTCTGTGCCCTC        | GeneID:100500764                    |
| <i>Atg6</i>          | F: GTTATACGGTTCGGGTGG<br>R: TGGAGTACGCATGTGGTG       | GeneID: 100216352                   |
| <i>Atg8</i>          | F: AAGGCTAGGCTTGGAGAC<br>R: CAGATGTGGGTGGAATGA       | GeneID:692938                       |
| <i>Rp49</i>          | F: GCATCAATCGGATCGCTATG<br>R: GGACCTTACGGAATCCATTTG  | GeneID:6100595                      |
| <i>P38</i>           | F: GTGGGTTGTATTATGGCTGAG<br>R: GTTCTGCCGTTATGCGTTTAT | GeneID:NP_001036996.1               |
| <i>Moricin</i>       | F: CCGCTCCAGCAAAAATACCT<br>R: TTGAAAACATCGTTGGCTGT   | GeneID:NM_001043364.1               |
| <i>Cecropin A</i>    | F: TTGAGCTTCGTCTTCGCGTT<br>R: TTGCGTCCCACTTTCTCAATT  | GeneID:D17394                       |
| <i>Ced-6</i>         | F: GGACGGTGTTGCCATACAGG<br>R: TTATCGTCCGCGCAGTACG    | GeneID:AB531437                     |
| <i>Actin A1</i>      | F: TCCTCCGTCTGGACTTGGC<br>R: CGATTTCCTCTCAGCGGT      | NM_001126252.1                      |
| <i>Tetraspanin E</i> | F: CAGCGTCCTCCTCTTCACCT<br>R: CCTCGTCTGCGTTAGCGTC    | GeneID:DQ311225                     |
